# Supplementary material for: Assessing the effect of genetic markers on drug immunogenicity from a mechanistic model-based approach
Source: PubMed Central journal article supplement (PMC7082907; doi:10.1186/s12874-020-00941-z), 2020-03-20
Supplement: 12874_2020_941_MOESM1_ESM.pdf [file 12874_2020_941_MOESM1_ESM.pdf]

**Additional Files**

Information scalar and matrix for the test statistic

The elements of the information matrices are computed under the null hypothesis by substituting  $\pi_0$ ,  $W_1$  and  $W_2$  by their efficient estimators.

Second derivative of  $LL1$  for the information scalar  $\hat{J}_{H_0}$ :

$$\hat{J}_{H_0} = \frac{\partial^2 LL1}{\partial^2 \beta} = \sum_{i=1}^n G_{1i}^2 \{Z_i - \pi_0\}$$

Second derivatives of  $LL2$  for the information matrix  $\hat{I}_{H_0}$ :

$$\begin{aligned} \hat{V}_{H_0, \alpha_1} &= \frac{\partial^2 LPL_2}{\partial^2 \alpha_1} = \sum_{i=1}^n \delta_i W_1(t)^2 \left\{ \frac{\sum_{k=1}^n Y_k(t_i) G_{1k}^2 \sum_{k=1}^n Y_k(t_i) - \left( \sum_{k=1}^n Y_k(t_i) G_{1k} \right)^2}{\left( \sum_{k=1}^n Y_k(t_i) \right)^2} \right\} \\ \hat{V}_{H_0, \alpha_2} &= \frac{\partial^2 LPL_2}{\partial^2 \alpha_2} = \sum_{i=1}^n \delta_i W_1(t)^2 \left\{ \frac{\sum_{k=1}^n Y_k(t_i) G_{2k}^2 \sum_{k=1}^n Y_k(t_i) - \left( \sum_{k=1}^n Y_k(t_i) G_{2k} \right)^2}{\left( \sum_{k=1}^n Y_k(t_i) \right)^2} \right\} \\ \hat{V}_{H_0, \alpha_1 \alpha_2} &= \frac{\partial^2 LPL_2}{\partial \alpha_1 \partial \alpha_2} = \sum_{i=1}^n \delta_i W_1(t)^2 \left\{ \frac{\sum_{k=1}^n Y_k(t_i) G_{1k} G_{2k} \sum_{k=1}^n Y_k(t_i) - \sum_{k=1}^n Y_k(t_i) G_{1k} \sum_{k=1}^n Y_k(t_i) G_{2k}}{\left( \sum_{k=1}^n Y_k(t_i) \right)^2} \right\} \\ \hat{V}_{H_0, \gamma_1} &= \frac{\partial^2 LPL_2}{\partial^2 \gamma_1} = \sum_{i=1}^n \delta_i W_2(t)^2 \left\{ \frac{\sum_{k=1}^n Y_k(t_i) G_{1k}^2 \sum_{k=1}^n Y_k(t_i) - \left( \sum_{k=1}^n Y_k(t_i) G_{1k} \right)^2}{\left( \sum_{k=1}^n Y_k(t_i) \right)^2} \right\} \\ \hat{V}_{H_0, \gamma_2} &= \frac{\partial^2 LPL_2}{\partial^2 \gamma_2} = \sum_{i=1}^n \delta_i W_2(t)^2 \left\{ \frac{\sum_{k=1}^n Y_k(t_i) G_{2k}^2 \sum_{k=1}^n Y_k(t_i) - \left( \sum_{k=1}^n Y_k(t_i) G_{2k} \right)^2}{\left( \sum_{k=1}^n Y_k(t_i) \right)^2} \right\} \\ \hat{V}_{H_0, \gamma_1 \gamma_2} &= \frac{\partial^2 LPL_2}{\partial \gamma_1 \partial \gamma_2} = \sum_{i=1}^n \delta_i W_2(t)^2 \left\{ \frac{\sum_{k=1}^n Y_k(t_i) G_{1k} G_{2k} \sum_{k=1}^n Y_k(t_i) - \sum_{k=1}^n Y_k(t_i) G_{1k} \sum_{k=1}^n Y_k(t_i) G_{2k}}{\left( \sum_{k=1}^n Y_k(t_i) \right)^2} \right\} \\ \hat{V}_{H_0, \alpha_1 \gamma_1} &= \frac{\partial^2 LPL_2}{\partial \alpha_1 \partial \gamma_1} = \sum_{i=1}^n \delta_i W_2(t) W_1(t) \left\{ \frac{\sum_{k=1}^n Y_k(t_i) G_{1k}^2 \sum_{k=1}^n Y_k(t_i) - \left( \sum_{k=1}^n Y_k(t_i) G_{1k} \right)^2}{\left( \sum_{k=1}^n Y_k(t_i) \right)^2} \right\} \\ \hat{V}_{H_0, \alpha_1 \gamma_2} &= \frac{\partial^2 LPL_2}{\partial \alpha_1 \partial \gamma_2} = \sum_{i=1}^n \delta_i W_2(t) W_1(t) \left\{ \frac{\sum_{k=1}^n Y_k(t_i) G_{1k} G_{2k} \sum_{k=1}^n Y_k(t_i) - \sum_{k=1}^n Y_k(t_i) G_{1k} \sum_{k=1}^n Y_k(t_i) G_{2k}}{\left( \sum_{k=1}^n Y_k(t_i) \right)^2} \right\} \\ \hat{V}_{H_0, \alpha_2 \gamma_1} &= \frac{\partial^2 LPL_2}{\partial \alpha_2 \partial \gamma_1} = \sum_{i=1}^n \delta_i W_2(t) W_1(t) \left\{ \frac{\sum_{k=1}^n Y_k(t_i) G_{1k} G_{2k} \sum_{k=1}^n Y_k(t_i) - \sum_{k=1}^n Y_k(t_i) G_{1k} \sum_{k=1}^n Y_k(t_i) G_{2k}}{\left( \sum_{k=1}^n Y_k(t_i) \right)^2} \right\} \\ \hat{V}_{H_0, \alpha_2 \gamma_2} &= \frac{\partial^2 LPL_2}{\partial \alpha_2 \partial \gamma_2} = \sum_{i=1}^n \delta_i W_2(t) W_1(t) \left\{ \frac{\sum_{k=1}^n Y_k(t_i) G_{2k}^2 \sum_{k=1}^n Y_k(t_i) - \left( \sum_{k=1}^n Y_k(t_i) G_{2k} \right)^2}{\left( \sum_{k=1}^n Y_k(t_i) \right)^2} \right\} \end{aligned}$$

and

$$\hat{I}_{H_0} = \begin{pmatrix} \hat{V}_{H_0, \alpha_1} & \hat{V}_{H_0, \alpha_1 \alpha_2} & \hat{V}_{H_0, \alpha_1 \gamma_1} & \hat{V}_{H_0, \alpha_1 \gamma_2} \\ \hat{V}_{H_0, \alpha_1 \alpha_2} & \hat{V}_{H_0, \alpha_2} & \hat{V}_{H_0, \alpha_2 \gamma_1} & \hat{V}_{H_0, \alpha_2 \gamma_2} \\ \hat{V}_{H_0, \alpha_1 \gamma_1} & \hat{V}_{H_0, \alpha_2 \gamma_1} & \hat{V}_{H_0, \gamma_1} & \hat{V}_{H_0, \gamma_1 \gamma_2} \\ \hat{V}_{H_0, \alpha_1 \gamma_2} & \hat{V}_{H_0, \alpha_2 \gamma_2} & \hat{V}_{H_0, \gamma_1 \gamma_2} & \hat{V}_{H_0, \gamma_2} \end{pmatrix}$$

Additional simulation results

Table S1: Power of the TWIST compared to the TLRT with 20% censoring

(a)  $\alpha$  has an additive effect and  $e^\alpha > 1$ 

|             | Underdispersion<br>( $\gamma_1 = -0.35$ and $\gamma_2 = 0$ ) |      | Equidispersion<br>( $\gamma_1 = 0$ and $\gamma_2 = 0$ ) |      | Overdispersion<br>( $\gamma_1 = 0.1$ and $\gamma_2 = 0$ ) |      |
|-------------|--------------------------------------------------------------|------|---------------------------------------------------------|------|-----------------------------------------------------------|------|
|             | TWIST                                                        | TLRT | TWIST                                                   | TLRT | TWIST                                                     | TLRT |
| <b>2</b>    | 0.90                                                         | 0.90 | 0.21                                                    | 0.24 | 0.17                                                      | 0.16 |
| <b>1</b>    | 0.85                                                         | 0.82 | 0.10                                                    | 0.08 | 0.09                                                      | 0.07 |
| <b>0.50</b> | 0.90                                                         | 0.89 | 0.16                                                    | 0.15 | 0.10                                                      | 0.10 |

(b)  $\alpha$  has no effect,  $e^\alpha = 1$ 

|             | Underdispersion<br>( $\gamma_1 = -0.35$ and $\gamma_2 = 0$ ) |      | Equidispersion<br>( $\gamma_1 = 0$ and $\gamma_2 = 0$ ) |             | Overdispersion<br>( $\gamma_1 = 0.1$ and $\gamma_2 = 0$ ) |      |
|-------------|--------------------------------------------------------------|------|---------------------------------------------------------|-------------|-----------------------------------------------------------|------|
|             | TWIST                                                        | TLRT | TWIST                                                   | TLRT        | TWIST                                                     | TLRT |
| <b>2</b>    | 0.45                                                         | 0.51 | 0.09                                                    | 0.09        | 0.59                                                      | 0.60 |
| <b>1</b>    | 0.34                                                         | 0.35 | <u>0.03</u>                                             | <u>0.03</u> | 0.44                                                      | 0.45 |
| <b>0.50</b> | 0.41                                                         | 0.42 | <u>0.05</u>                                             | <u>0.05</u> | 0.51                                                      | 0.53 |

The underlined values show the estimated level of the type I error.

(c)  $\alpha$  has an additive effect and  $e^\alpha < 1$ 

|             | Underdispersion<br>( $\gamma_1 = -0.35$ and $\gamma_2 = 0$ ) |      | Equidispersion<br>( $\gamma_1 = 0$ and $\gamma_2 = 0$ ) |      | Overdispersion<br>( $\gamma_1 = 0.1$ and $\gamma_2 = 0$ ) |      |
|-------------|--------------------------------------------------------------|------|---------------------------------------------------------|------|-----------------------------------------------------------|------|
|             | TWIST                                                        | TLRT | TWIST                                                   | TLRT | TWIST                                                     | TLRT |
| <b>2</b>    | 0.11                                                         | 0.16 | 0.33                                                    | 0.27 | 0.93                                                      | 0.91 |
| <b>1</b>    | 0.06                                                         | 0.07 | 0.20                                                    | 0.14 | 0.92                                                      | 0.87 |
| <b>0.50</b> | 0.05                                                         | 0.08 | 0.25                                                    | 0.17 | 0.94                                                      | 0.91 |

$\alpha$  and  $\gamma$  both have additive effects. The tail defects for the [AA], [Aa] and [aa] groups are respectively : 0.50, 0.55 and 0.59 for  $\gamma_1 = -0.35$ , and 0.50, 0.44 and 0.37 for  $\gamma_1 = 0.10$ . The proportion of pre-immune subjects is 10% and the MAF is 20%.

Table S2: Power of the TWIST compared to the TLRT with a 10% minor allele frequency

(a)  $\alpha$  has an additive effect and  $e^\alpha > 1$ 

|             | Underdispersion<br>( $\gamma_1 = -0.35$ and $\gamma_2 = 0$ ) |      | Equidispersion<br>( $\gamma_1 = 0$ and $\gamma_2 = 0$ ) |      | Overdispersion<br>( $\gamma_1 = 0.1$ and $\gamma_2 = 0$ ) |      |
|-------------|--------------------------------------------------------------|------|---------------------------------------------------------|------|-----------------------------------------------------------|------|
|             | TWIST                                                        | TLRT | TWIST                                                   | TLRT | TWIST                                                     | TLRT |
| <b>2</b>    | 0.58                                                         | 0.16 | 0.18                                                    | 0.03 | 0.27                                                      | 0.18 |
| <b>1</b>    | 0.63                                                         | 0.18 | 0.16                                                    | 0.01 | 0.26                                                      | 0.15 |
| <b>0.50</b> | 0.63                                                         | 0.17 | 0.16                                                    | 0.01 | 0.27                                                      | 0.18 |

(b)  $\alpha$  has no effect,  $e^\alpha = 1$ 

|            | Underdispersion<br>( $\gamma_1 = -0.35$ and $\gamma_2 = 0$ ) |      | Equidispersion<br>( $\gamma_1 = 0$ and $\gamma_2 = 0$ ) |      | Overdispersion<br>( $\gamma_1 = 0.1$ and $\gamma_2 = 0$ ) |      |
|------------|--------------------------------------------------------------|------|---------------------------------------------------------|------|-----------------------------------------------------------|------|
|            | TWIST                                                        | TLRT | TWIST                                                   | TLRT | TWIST                                                     | TLRT |
| <b>2</b>   | 0.16                                                         | 0.12 | 0.06                                                    | 0.04 | 0.32                                                      | 0.29 |
| <b>1</b>   | 0.14                                                         | 0.10 | 0.04                                                    | 0.03 | 0.31                                                      | 0.28 |
| <b>0.5</b> | 0.19                                                         | 0.13 | 0.06                                                    | 0.04 | 0.33                                                      | 0.31 |

The underlined values show the estimated level of the type I error.

(c)  $\alpha$  has an additive effect and  $e^\alpha < 1$ 

|             | Underdispersion<br>( $\gamma_1 = -0.35$ and $\gamma_2 = 0$ ) |      | Equidispersion<br>( $\gamma_1 = 0$ and $\gamma_2 = 0$ ) |      | Overdispersion<br>( $\gamma_1 = 0.1$ and $\gamma_2 = 0$ ) |      |
|-------------|--------------------------------------------------------------|------|---------------------------------------------------------|------|-----------------------------------------------------------|------|
|             | TWIST                                                        | TLRT | TWIST                                                   | TLRT | TWIST                                                     | TLRT |
| <b>2</b>    | 0.09                                                         | 0.10 | 0.20                                                    | 0.07 | 0.66                                                      | 0.41 |
| <b>1</b>    | 0.07                                                         | 0.08 | 0.20                                                    | 0.06 | 0.72                                                      | 0.42 |
| <b>0.50</b> | 0.06                                                         | 0.09 | 0.19                                                    | 0.07 | 0.73                                                      | 0.46 |

$\alpha$  and  $\gamma$  both have additive effects. The tail defects for the [AA], [Aa] and [aa] groups are respectively : 0.50, 0.55 and 0.59 for  $\gamma_1 = -0.35$ , and 0.50, 0.44 and 0.37 for  $\gamma_1 = 0.10$ . The proportion of pre-immune subjects is 10%.

Table S3: Power of the TWIST compared to the TLRT with a 30% minor allele frequency

(a)  $\alpha$  has an additive effect and  $e^\alpha > 1$ 

|            | Underdispersion<br>( $\gamma_1 = -0.35$ and $\gamma_2 = 0$ ) |      | Equidispersion<br>( $\gamma_1 = 0$ and $\gamma_2 = 0$ ) |      | Overdispersion<br>( $\gamma_1 = 0.1$ and $\gamma_2 = 0$ ) |      |
|------------|--------------------------------------------------------------|------|---------------------------------------------------------|------|-----------------------------------------------------------|------|
|            | TWIST                                                        | TLRT | TWIST                                                   | TLRT | TWIST                                                     | TLRT |
| <b>2</b>   | 0.99                                                         | 0.85 | 0.71                                                    | 0.39 | 0.76                                                      | 0.78 |
| <b>1</b>   | 0.98                                                         | 0.51 | 0.40                                                    | 0.03 | 0.46                                                      | 0.40 |
| <b>0.5</b> | 1                                                            | 0.66 | 0.52                                                    | 0.08 | 0.59                                                      | 0.53 |

(b)  $\alpha$  has no effect,  $e^\alpha = 1$ 

|            | Underdispersion<br>( $\gamma_1 = -0.35$ and $\gamma_2 = 0$ ) |      | Equidispersion<br>( $\gamma_1 = 0$ and $\gamma_2 = 0$ ) |      | Overdispersion<br>( $\gamma_1 = 0.1$ and $\gamma_2 = 0$ ) |      |
|------------|--------------------------------------------------------------|------|---------------------------------------------------------|------|-----------------------------------------------------------|------|
|            | TWIST                                                        | TLRT | TWIST                                                   | TLRT | TWIST                                                     | TLRT |
| <b>2</b>   | 0.80                                                         | 0.74 | 0.27                                                    | 0.37 | 0.84                                                      | 0.88 |
| <b>1</b>   | 0.50                                                         | 0.34 | 0.03                                                    | 0.02 | 0.61                                                      | 0.60 |
| <b>0.5</b> | 0.63                                                         | 0.50 | 0.06                                                    | 0.05 | 0.75                                                      | 0.77 |

The underlined values show the estimated level of the type I error.

(c)  $\alpha$  has an additive effect and  $e^\alpha < 1$ 

|            | Underdispersion<br>( $\gamma_1 = -0.35$ and $\gamma_2 = 0$ ) |      | Equidispersion<br>( $\gamma_1 = 0$ and $\gamma_2 = 0$ ) |      | Overdispersion<br>( $\gamma_1 = 0.1$ and $\gamma_2 = 0$ ) |      |
|------------|--------------------------------------------------------------|------|---------------------------------------------------------|------|-----------------------------------------------------------|------|
|            | TWIST                                                        | TLRT | TWIST                                                   | TLRT | TWIST                                                     | TLRT |
| <b>2</b>   | 0.52                                                         | 0.67 | 0.71                                                    | 0.43 | 1                                                         | 0.95 |
| <b>1</b>   | 0.19                                                         | 0.21 | 0.38                                                    | 0.05 | 0.98                                                      | 0.81 |
| <b>0.5</b> | 0.31                                                         | 0.37 | 0.54                                                    | 0.10 | 0.99                                                      | 0.90 |

$\alpha$  and  $\gamma$  both have additive effects. The tail defects for the [AA], [Aa] and [aa] groups are respectively : 0.50, 0.55 and 0.59 for  $\gamma_1 = -0.35$ , and 0.50, 0.44 and 0.37 for  $\gamma_1 = 0.10$ . The proportion of pre-immune subjects is 10%.

Table S4: Power of the TWIST compared to the TLRT with 5% pre-immune subjects

(a)  $\alpha$  has an additive effect and  $e^\alpha > 1$ 

|            | Underdispersion<br>( $\gamma_1 = -0.35$ and $\gamma_2 = 0$ ) |      | Equidispersion<br>( $\gamma_1 = 0$ and $\gamma_2 = 0$ ) |      | Overdispersion<br>( $\gamma_1 = 0.1$ and $\gamma_2 = 0$ ) |      |
|------------|--------------------------------------------------------------|------|---------------------------------------------------------|------|-----------------------------------------------------------|------|
|            | TWIST                                                        | TLRT | TWIST                                                   | TLRT | TWIST                                                     | TLRT |
| <b>2</b>   | 0.95                                                         | 0.50 | 0.39                                                    | 0.06 | 0.44                                                      | 0.35 |
| <b>1</b>   | 0.93                                                         | 0.38 | 0.32                                                    | 0.03 | 0.40                                                      | 0.30 |
| <b>0.5</b> | 0.96                                                         | 0.44 | 0.31                                                    | 0.02 | 0.41                                                      | 0.32 |

(b)  $\alpha$  has no effect,  $e^\alpha = 1$ 

|            | Underdispersion<br>( $\gamma_1 = -0.35$ and $\gamma_2 = 0$ ) |      | Equidispersion<br>( $\gamma_1 = 0$ and $\gamma_2 = 0$ ) |             | Overdispersion<br>( $\gamma_1 = 0.1$ and $\gamma_2 = 0$ ) |      |
|------------|--------------------------------------------------------------|------|---------------------------------------------------------|-------------|-----------------------------------------------------------|------|
|            | TWIST                                                        | TLRT | TWIST                                                   | TLRT        | TWIST                                                     | TLRT |
| <b>2</b>   | 0.50                                                         | 0.38 | 0.06                                                    | 0.05        | 0.56                                                      | 0.56 |
| <b>1</b>   | 0.40                                                         | 0.28 | 0.03                                                    | 0.03        | 0.50                                                      | 0.49 |
| <b>0.5</b> | 0.44                                                         | 0.32 | <u>0.03</u>                                             | <u>0.03</u> | 0.50                                                      | 0.49 |

The underlined values show the estimated level of the type I error.

(c)  $\alpha$  has an additive effect and  $e^\alpha < 1$ 

|            | Underdispersion<br>( $\gamma_1 = -0.35$ and $\gamma_2 = 0$ ) |      | Equidispersion<br>( $\gamma_1 = 0$ and $\gamma_2 = 0$ ) |      | Overdispersion<br>( $\gamma_1 = 0.1$ and $\gamma_2 = 0$ ) |      |
|------------|--------------------------------------------------------------|------|---------------------------------------------------------|------|-----------------------------------------------------------|------|
|            | TWIST                                                        | TLRT | TWIST                                                   | TLRT | TWIST                                                     | TLRT |
| <b>2</b>   | 0.20                                                         | 0.27 | 0.38                                                    | 0.10 | 0.95                                                      | 0.77 |
| <b>1</b>   | 0.13                                                         | 0.16 | 0.33                                                    | 0.06 | 0.94                                                      | 0.67 |
| <b>0.5</b> | 0.16                                                         | 0.20 | 0.35                                                    | 0.06 | 0.94                                                      | 0.70 |

$\alpha$  and  $\gamma$  both have additive effects. The tail defects for the [AA], [Aa] and [aa] groups are respectively : 0.50, 0.55 and 0.59 for  $\gamma_1 = -0.35$ , and 0.50, 0.44 and 0.37 for  $\gamma_1 = 0.10$ . The MAF is 20%.

Table S5: Power of the TWIST compared to the TLRT with 20% pre-immune subjects

(a)  $\alpha$  has an additive effect and  $e^\alpha > 1$ 

|            | Underdispersion<br>( $\gamma_1 = -0.35$ and $\gamma_2 = 0$ ) |      | Equidispersion<br>( $\gamma_1 = 0$ and $\gamma_2 = 0$ ) |      | Overdispersion<br>( $\gamma_1 = 0.1$ and $\gamma_2 = 0$ ) |      |
|------------|--------------------------------------------------------------|------|---------------------------------------------------------|------|-----------------------------------------------------------|------|
|            | TWIST                                                        | TLRT | TWIST                                                   | TLRT | TWIST                                                     | TLRT |
| <b>2</b>   | 0.93                                                         | 0.57 | 0.43                                                    | 0.15 | 0.51                                                      | 0.47 |
| <b>1</b>   | 0.89                                                         | 0.32 | 0.25                                                    | 0.03 | 0.32                                                      | 0.23 |
| <b>0.5</b> | 0.94                                                         | 0.51 | 0.37                                                    | 0.06 | 0.44                                                      | 0.39 |

(b)  $\alpha$  has no effect,  $e^\alpha = 1$ 

|            | Underdispersion<br>( $\gamma_1 = -0.35$ and $\gamma_2 = 0$ ) |      | Equidispersion<br>( $\gamma_1 = 0$ and $\gamma_2 = 0$ ) |      | Overdispersion<br>( $\gamma_1 = 0.1$ and $\gamma_2 = 0$ ) |      |
|------------|--------------------------------------------------------------|------|---------------------------------------------------------|------|-----------------------------------------------------------|------|
|            | TWIST                                                        | TLRT | TWIST                                                   | TLRT | TWIST                                                     | TLRT |
| <b>2</b>   | 0.50                                                         | 0.48 | 0.17                                                    | 0.17 | 0.61                                                      | 0.62 |
| <b>1</b>   | 0.31                                                         | 0.21 | 0.03                                                    | 0.02 | 0.41                                                      | 0.41 |
| <b>0.5</b> | 0.47                                                         | 0.38 | 0.06                                                    | 0.06 | 0.58                                                      | 0.57 |

The underlined values show the estimated level of the type I error.

(c)  $\alpha$  has an additive effect and  $e^\alpha < 1$ 

|            | Underdispersion<br>( $\gamma_1 = -0.35$ and $\gamma_2 = 0$ ) |      | Equidispersion<br>( $\gamma_1 = 0$ and $\gamma_2 = 0$ ) |      | Overdispersion<br>( $\gamma_1 = 0.1$ and $\gamma_2 = 0$ ) |      |
|------------|--------------------------------------------------------------|------|---------------------------------------------------------|------|-----------------------------------------------------------|------|
|            | TWIST                                                        | TLRT | TWIST                                                   | TLRT | TWIST                                                     | TLRT |
| <b>2</b>   | 0.26                                                         | 0.39 | 0.45                                                    | 0.22 | 0.92                                                      | 0.75 |
| <b>1</b>   | 0.10                                                         | 0.11 | 0.26                                                    | 0.05 | 0.89                                                      | 0.60 |
| <b>0.5</b> | 0.19                                                         | 0.24 | 0.42                                                    | 0.11 | 0.95                                                      | 0.75 |

$\alpha$  and  $\gamma$  both have additive effects. The tail defects for the [AA], [Aa] and [aa] groups are respectively : 0.50, 0.55 and 0.59 for  $\gamma_1 = -0.35$ , and 0.50, 0.44 and 0.37 for  $\gamma_1 = 0.10$ . The MAF is 20%.

Table S6: Power of the TWIST compared to the TLRT with a 30% tail defect for the reference group

(a)  $\alpha$  has an additive effect and  $e^\alpha > 1$ 

|             | Underdispersion<br>( $\gamma_1 = -0.60$ and $\gamma_2 = 0$ ) |      | Equidispersion<br>( $\gamma_1 = 0$ and $\gamma_2 = 0$ ) |      | Overdispersion<br>( $\gamma_1 = 0.17$ and $\gamma_2 = 0$ ) |      |
|-------------|--------------------------------------------------------------|------|---------------------------------------------------------|------|------------------------------------------------------------|------|
|             | TWIST                                                        | TLRT | TWIST                                                   | TLRT | TWIST                                                      | TLRT |
| <b>2</b>    | 0.99                                                         | 0.77 | 0.50                                                    | 0.10 | 0.51                                                       | 0.48 |
| <b>1</b>    | 0.98                                                         | 0.66 | 0.37                                                    | 0.04 | 0.40                                                       | 0.33 |
| <b>0.50</b> | 0.99                                                         | 0.75 | 0.45                                                    | 0.07 | 0.48                                                       | 0.41 |

(b)  $\alpha$  has no effect,  $e^\alpha = 1$ 

|             | Underdispersion<br>( $\gamma_1 = -0.60$ and $\gamma_2 = 0$ ) |      | Equidispersion<br>( $\gamma_1 = 0$ and $\gamma_2 = 0$ ) |      | Overdispersion<br>( $\gamma_1 = 0.17$ and $\gamma_2 = 0$ ) |      |
|-------------|--------------------------------------------------------------|------|---------------------------------------------------------|------|------------------------------------------------------------|------|
|             | TWIST                                                        | TLRT | TWIST                                                   | TLRT | TWIST                                                      | TLRT |
| <b>2</b>    | 0.62                                                         | 0.54 | 0.09                                                    | 0.10 | 0.78                                                       | 0.81 |
| <b>1</b>    | 0.48                                                         | 0.37 | 0.03                                                    | 0.02 | 0.69                                                       | 0.67 |
| <b>0.50</b> | 0.58                                                         | 0.46 | 0.04                                                    | 0.03 | 0.76                                                       | 0.73 |

The underlined values show the estimated level of the type I error.

(c)  $\alpha$  has an additive effect and  $e^\alpha < 1$ 

|             | Underdispersion<br>( $\gamma_1 = -0.60$ and $\gamma_2 = 0$ ) |      | Equidispersion<br>( $\gamma_1 = 0$ and $\gamma_2 = 0$ ) |      | Overdispersion<br>( $\gamma_1 = 0.17$ and $\gamma_2 = 0$ ) |      |
|-------------|--------------------------------------------------------------|------|---------------------------------------------------------|------|------------------------------------------------------------|------|
|             | TWIST                                                        | TLRT | TWIST                                                   | TLRT | TWIST                                                      | TLRT |
| <b>2</b>    | 0.24                                                         | 0.31 | 0.50                                                    | 0.19 | 1                                                          | 0.95 |
| <b>1</b>    | 0.14                                                         | 0.17 | 0.39                                                    | 0.08 | 0.99                                                       | 0.91 |
| <b>0.50</b> | 0.20                                                         | 0.22 | 0.49                                                    | 0.12 | 1                                                          | 0.94 |

$\alpha$  and  $\gamma$  both have additive effects. The tail defects for the [AA], [Aa] and [aa] groups are respectively : 0.30, 0.39 and 0.45 for  $\gamma_1 = -0.60$ , and 0.30, 0.20 and 0.07 for  $\gamma_1 = 0.17$ . The proportion of pre-immune subjects is 10% and the MAF is 20%.

Table S7: Power of the TWIST compared to the TLRT under different genetic models

(a)  $e^\alpha > 1$

| $e^\beta$ | $\alpha$     | Dominant $\gamma$           |                            |                            |                           | Overdominant $\gamma$   |                            |                         |                           | Additive $\gamma$           |                        |                            |                        | Recessive $\gamma$          |                           |                            |                            |
|-----------|--------------|-----------------------------|----------------------------|----------------------------|---------------------------|-------------------------|----------------------------|-------------------------|---------------------------|-----------------------------|------------------------|----------------------------|------------------------|-----------------------------|---------------------------|----------------------------|----------------------------|
|           |              | Underdispersion             |                            | Overdispersion             |                           | Underdispersion         |                            | Overdispersion          |                           | Underdispersion             |                        | Overdispersion             |                        | Underdispersion             |                           | Overdispersion             |                            |
|           |              | $\gamma_1 = -0.35$<br>TWIST | $\gamma_2 = -0.35$<br>TLRT | $\gamma_1 = 0.10$<br>TWIST | $\gamma_2 = 0.10$<br>TLRT | $\gamma_1 = 0$<br>TWIST | $\gamma_2 = -0.70$<br>TLRT | $\gamma_1 = 0$<br>TWIST | $\gamma_2 = 0.20$<br>TLRT | $\gamma_1 = -0.35$<br>TWIST | $\gamma_2 = 0$<br>TLRT | $\gamma_1 = 0.10$<br>TWIST | $\gamma_2 = 0$<br>TLRT | $\gamma_1 = -0.35$<br>TWIST | $\gamma_2 = 0.35$<br>TLRT | $\gamma_1 = 0.10$<br>TWIST | $\gamma_2 = -0.10$<br>TLRT |
| 2         | overdominant | 1                           | 0.91                       | 0.89                       | 0.87                      | 1                       | 0.90                       | 0.94                    | 0.91                      | 1                           | 0.63                   | 0.85                       | 0.48                   | 0.87                        | 0.21                      | 0.94                       | 0.48                       |
| 2         | dominant     | 1                           | 0.92                       | 0.94                       | 0.90                      | 1                       | 0.91                       | 0.92                    | 0.90                      | 0.99                        | 0.61                   | 0.79                       | 0.34                   | 0.94                        | 0.24                      | 0.91                       | 0.36                       |
| 2         | additive     | 0.99                        | 0.84                       | 0.93                       | 0.94                      | 1                       | 0.87                       | 0.93                    | 0.95                      | 0.95                        | 0.56                   | 0.49                       | 0.42                   | 0.60                        | 0.21                      | 0.48                       | 0.29                       |
| 2         | recessive    | 0.91                        | 0.77                       | 0.99                       | 0.98                      | 0.96                    | 0.81                       | 0.99                    | 0.98                      | 0.72                        | 0.46                   | 0.55                       | 0.54                   | 0.44                        | 0.19                      | 0.32                       | 0.30                       |
| 1         | overdominant | 1                           | 0.85                       | 0.84                       | 0.80                      | 1                       | 0.83                       | 0.91                    | 0.85                      | 1                           | 0.47                   | 0.80                       | 0.34                   | 0.80                        | 0.09                      | 0.91                       | 0.37                       |
| 1         | dominant     | 1                           | 0.82                       | 0.87                       | 0.79                      | 1                       | 0.86                       | 0.87                    | 0.81                      | 1                           | 0.47                   | 0.67                       | 0.22                   | 0.88                        | 0.11                      | 0.84                       | 0.24                       |
| 1         | additive     | 0.99                        | 0.73                       | 0.88                       | 0.88                      | 1                       | 0.76                       | 0.87                    | 0.89                      | 0.93                        | 0.36                   | 0.37                       | 0.28                   | 0.49                        | 0.08                      | 0.42                       | 0.22                       |
| 1         | recessive    | 0.86                        | 0.63                       | 0.98                       | 0.95                      | 0.92                    | 0.68                       | 0.97                    | 0.96                      | 0.62                        | 0.29                   | 0.40                       | 0.35                   | 0.34                        | 0.09                      | 0.24                       | 0.17                       |
| 0.5       | overdominant | 1                           | 0.88                       | 0.87                       | 0.82                      | 1                       | 0.88                       | 0.93                    | 0.88                      | 1                           | 0.53                   | 0.84                       | 0.42                   | 0.84                        | 0.14                      | 0.95                       | 0.43                       |
| 0.5       | dominant     | 1                           | 0.88                       | 0.92                       | 0.86                      | 1                       | 0.90                       | 0.92                    | 0.88                      | 1                           | 0.56                   | 0.76                       | 0.30                   | 0.94                        | 0.16                      | 0.89                       | 0.30                       |
| 0.5       | additive     | 1                           | 0.81                       | 0.93                       | 0.94                      | 1                       | 0.84                       | 0.89                    | 0.93                      | 0.95                        | 0.47                   | 0.42                       | 0.32                   | 0.62                        | 0.16                      | 0.49                       | 0.25                       |
| 0.5       | recessive    | 0.91                        | 0.73                       | 0.99                       | 0.97                      | 0.98                    | 0.77                       | 0.98                    | 0.98                      | 0.71                        | 0.38                   | 0.51                       | 0.44                   | 0.44                        | 0.12                      | 0.28                       | 0.21                       |

When  $\alpha$  is dominant,  $\alpha_1 = \alpha_2 = 0.5 \times \log(2)$ . When  $\alpha$  is overdominant,  $\alpha_1 = 0$  and  $\alpha_2 = \log(2)$ . When  $\alpha$  is additive,  $\alpha_1 = 0.5 \times \log(2)$  and  $\alpha_2 = 0$ . When  $\alpha$  is recessive,  $\alpha_1 = 0.5 \times \log(2)$  and  $\alpha_2 = -0.5 \times \log(2)$ .

(b)  $e^\alpha < 1$

| $e^\beta$ | $\alpha$     | Dominant $\gamma$           |                            |                            |                           | Overdominant $\gamma$   |                            |                         |                           | Additive $\gamma$           |                        |                            |                        | Recessive $\gamma$          |                           |                            |                            |
|-----------|--------------|-----------------------------|----------------------------|----------------------------|---------------------------|-------------------------|----------------------------|-------------------------|---------------------------|-----------------------------|------------------------|----------------------------|------------------------|-----------------------------|---------------------------|----------------------------|----------------------------|
|           |              | Underdispersion             |                            | Overdispersion             |                           | Underdispersion         |                            | Overdispersion          |                           | Underdispersion             |                        | Overdispersion             |                        | Underdispersion             |                           | Overdispersion             |                            |
|           |              | $\gamma_1 = -0.35$<br>TWIST | $\gamma_2 = -0.35$<br>TLRT | $\gamma_1 = 0.10$<br>TWIST | $\gamma_2 = 0.10$<br>TLRT | $\gamma_1 = 0$<br>TWIST | $\gamma_2 = -0.70$<br>TLRT | $\gamma_1 = 0$<br>TWIST | $\gamma_2 = 0.20$<br>TLRT | $\gamma_1 = -0.35$<br>TWIST | $\gamma_2 = 0$<br>TLRT | $\gamma_1 = 0.10$<br>TWIST | $\gamma_2 = 0$<br>TLRT | $\gamma_1 = -0.35$<br>TWIST | $\gamma_2 = 0.35$<br>TLRT | $\gamma_1 = 0.10$<br>TWIST | $\gamma_2 = -0.10$<br>TLRT |
| 2         | overdominant | 0.55                        | 0.60                       | 1                          | 1                         | 0.64                    | 0.64                       | 1                       | 1                         | 0.59                        | 0.29                   | 0.99                       | 0.80                   | 0.92                        | 0.25                      | 0.91                       | 0.46                       |
| 2         | dominant     | 0.65                        | 0.62                       | 1                          | 1                         | 0.53                    | 0.61                       | 1                       | 1                         | 0.49                        | 0.26                   | 1                          | 0.84                   | 0.87                        | 0.20                      | 0.97                       | 0.54                       |
| 2         | additive     | 0.75                        | 0.75                       | 1                          | 0.99                      | 0.62                    | 0.70                       | 1                       | 1                         | 0.22                        | 0.32                   | 0.95                       | 0.77                   | 0.34                        | 0.16                      | 0.80                       | 0.52                       |
| 2         | recessive    | 0.93                        | 0.79                       | 0.98                       | 0.98                      | 0.91                    | 0.79                       | 0.99                    | 0.98                      | 0.45                        | 0.39                   | 0.80                       | 0.67                   | 0.11                        | 0.14                      | 0.70                       | 0.51                       |
| 1         | overdominant | 0.39                        | 0.40                       | 1                          | 0.99                      | 0.49                    | 0.45                       | 1                       | 1                         | 0.46                        | 0.12                   | 0.99                       | 0.67                   | 0.86                        | 0.12                      | 0.87                       | 0.28                       |
| 1         | dominant     | 0.56                        | 0.47                       | 1                          | 1                         | 0.41                    | 0.44                       | 1                       | 1                         | 0.33                        | 0.12                   | 0.99                       | 0.72                   | 0.78                        | 0.10                      | 0.95                       | 0.44                       |
| 1         | additive     | 0.66                        | 0.58                       | 1                          | 0.98                      | 0.51                    | 0.55                       | 1                       | 0.99                      | 0.11                        | 0.14                   | 0.91                       | 0.65                   | 0.21                        | 0.06                      | 0.75                       | 0.42                       |
| 1         | recessive    | 0.94                        | 0.69                       | 0.97                       | 0.95                      | 0.86                    | 0.69                       | 0.99                    | 0.97                      | 0.31                        | 0.23                   | 0.80                       | 0.59                   | 0.04                        | 0.05                      | 0.73                       | 0.43                       |
| 0.5       | overdominant | 0.49                        | 0.51                       | 1                          | 1                         | 0.62                    | 0.58                       | 1                       | 1                         | 0.55                        | 0.15                   | 1                          | 0.74                   | 0.90                        | 0.18                      | 0.91                       | 0.38                       |
| 0.5       | dominant     | 0.65                        | 0.55                       | 1                          | 1                         | 0.48                    | 0.52                       | 1                       | 1                         | 0.40                        | 0.15                   | 1                          | 0.79                   | 0.84                        | 0.13                      | 0.96                       | 0.54                       |
| 0.5       | additive     | 0.73                        | 0.67                       | 1                          | 0.98                      | 0.58                    | 0.63                       | 1                       | 0.99                      | 0.14                        | 0.18                   | 0.96                       | 0.74                   | 0.27                        | 0.11                      | 0.84                       | 0.53                       |
| 0.5       | recessive    | 0.95                        | 0.74                       | 0.98                       | 0.97                      | 0.89                    | 0.74                       | 1                       | 0.99                      | 0.38                        | 0.29                   | 0.84                       | 0.65                   | 0.06                        | 0.08                      | 0.76                       | 0.48                       |

When  $\alpha$  is dominant,  $\alpha_1 = \alpha_2 = 0.5 \times \log(0.5)$ . When  $\alpha$  is overdominant,  $\alpha_1 = 0$  and  $\alpha_2 = \log(0.5)$ . When  $\alpha$  is additive,  $\alpha_1 = 0.5 \times \log(0.5)$  and  $\alpha_2 = 0$ . When  $\alpha$  is recessive,  $\alpha_1 = 0.5 \times \log(0.5)$  and  $\alpha_2 = -0.5 \times \log(0.5)$ .

(c) Power of the TWIST and the TLRT with various genetic models for  $\gamma$  and  $\alpha = 0$

| $e^\beta$ | Overdominant $\gamma$   |                           |                         |                          | Dominant $\gamma$           |                            |                           |                          | Additive $\gamma$           |                        |                           |                        | Recessive $\gamma$          |                           |                           |                           |
|-----------|-------------------------|---------------------------|-------------------------|--------------------------|-----------------------------|----------------------------|---------------------------|--------------------------|-----------------------------|------------------------|---------------------------|------------------------|-----------------------------|---------------------------|---------------------------|---------------------------|
|           | Underdispersion         |                           | Overdispersion          |                          | Underdispersion             |                            | Overdispersion            |                          | Underdispersion             |                        | Overdispersion            |                        | Underdispersion             |                           | Overdispersion            |                           |
|           | $\gamma_1 = 0$<br>TWIST | $\gamma_2 = -0.7$<br>TLRT | $\gamma_1 = 0$<br>TWIST | $\gamma_2 = 0.2$<br>TLRT | $\gamma_1 = -0.35$<br>TWIST | $\gamma_2 = -0.35$<br>TLRT | $\gamma_1 = 0.1$<br>TWIST | $\gamma_2 = 0.1$<br>TLRT | $\gamma_1 = -0.35$<br>TWIST | $\gamma_2 = 0$<br>TLRT | $\gamma_1 = 0.1$<br>TWIST | $\gamma_2 = 0$<br>TLRT | $\gamma_1 = -0.35$<br>TWIST | $\gamma_2 = 0.35$<br>TLRT | $\gamma_1 = 0.1$<br>TWIST | $\gamma_2 = -0.1$<br>TLRT |
| 2         | 0.91                    | 0.77                      | 0.98                    | 0.98                     | 0.91                        | 0.81                       | 0.99                      | 0.99                     | 0.50                        | 0.44                   | 0.59                      | 0.60                   | 0.17                        | 0.18                      | 0.40                      | 0.41                      |
| 1         | 0.81                    | 0.64                      | 0.96                    | 0.94                     | 0.85                        | 0.65                       | 0.98                      | 0.96                     | 0.36                        | 0.25                   | 0.50                      | 0.48                   | 0.09                        | 0.07                      | 0.30                      | 0.30                      |
| 0.50      | 0.88                    | 0.73                      | 0.97                    | 0.96                     | 0.91                        | 0.75                       | 0.99                      | 0.98                     | 0.45                        | 0.34                   | 0.53                      | 0.53                   | 0.13                        | 0.12                      | 0.38                      | 0.37                      |

$\alpha_1 = \alpha_2 = 0$ .

The proportion of pre-immune subjects is 10% and the MAF is 20%.



Table S8: Power of the TWIST and the TLRT with  $\gamma = 0$  and various genetic models for  $\alpha$ .(a)  $e^\alpha > 1$ 

| $e^\beta$ | $\alpha$     | Equidispersion<br>( $\gamma_1 = 0$ and $\gamma_2 = 0$ ) |      |
|-----------|--------------|---------------------------------------------------------|------|
|           |              | TWIST                                                   | TLRT |
| 2         | overdominant | 0.84                                                    | 0.12 |
| 2         | dominant     | 0.85                                                    | 0.11 |
| 2         | additive     | 0.42                                                    | 0.08 |
| 2         | recessive    | 0.20                                                    | 0.09 |
| 1         | overdominant | 0.76                                                    | 0.05 |
| 1         | dominant     | 0.77                                                    | 0.03 |
| 1         | additive     | 0.29                                                    | 0.02 |
| 1         | recessive    | 0.11                                                    | 0.02 |
| 0.5       | overdominant | 0.81                                                    | 0.07 |
| 0.5       | dominant     | 0.84                                                    | 0.06 |
| 0.5       | additive     | 0.32                                                    | 0.03 |
| 0.5       | recessive    | 0.15                                                    | 0.03 |

When  $\alpha$  is dominant,  $\alpha_1 = \alpha_2 = 0.5 \times \log(2)$ . When  $\alpha$  is overdominant,  $\alpha_1 = 0$  and  $\alpha_2 = \log(2)$ . When  $\alpha$  is additive,  $\alpha_1 = 0.5 \times \log(2)$  and  $\alpha_2 = 0$ . When  $\alpha$  is recessive,  $\alpha_1 = 0.5 \times \log(2)$  and  $\alpha_2 = -0.5 \times \log(2)$ .

(b)  $e^\alpha < 1$ 

| $e^\beta$ | $\alpha$     | Equidispersion<br>( $\gamma_1 = 0$ and $\gamma_2 = 0$ ) |      |
|-----------|--------------|---------------------------------------------------------|------|
|           |              | TWIST                                                   | TLRT |
| 2         | overdominant | 0.83                                                    | 0.15 |
| 2         | dominant     | 0.87                                                    | 0.16 |
| 2         | additive     | 0.41                                                    | 0.12 |
| 2         | recessive    | 0.22                                                    | 0.11 |
| 1         | overdominant | 0.78                                                    | 0.05 |
| 1         | dominant     | 0.79                                                    | 0.06 |
| 1         | additive     | 0.30                                                    | 0.04 |
| 1         | recessive    | 0.14                                                    | 0.04 |
| 0.5       | overdominant | 0.83                                                    | 0.07 |
| 0.5       | dominant     | 0.85                                                    | 0.08 |
| 0.5       | additive     | 0.35                                                    | 0.05 |
| 0.5       | recessive    | 0.17                                                    | 0.06 |

When  $\alpha$  is dominant,  $\alpha_1 = \alpha_2 = 0.5 \times \log(0.5)$ . When  $\alpha$  is overdominant,  $\alpha_1 = 0$  and  $\alpha_2 = \log(0.5)$ . When  $\alpha$  is additive,  $\alpha_1 = 0.5 \times \log(0.5)$  and  $\alpha_2 = 0$ . When  $\alpha$  is recessive,  $\alpha_1 = 0.5 \times \log(0.5)$  and  $\alpha_2 = -0.5 \times \log(0.5)$ .

The proportion of pre-immune subjects is 10% and the MAF is 20%.
